# Supplementary material for: Nursing Home Admission and Home Care Initiation After Acute Aortic Dissection: A Nationwide Registry-Based Cohort Study
Source: PubMed Central journal article supplement — Tex Heart Inst J. 2024 Dec 12;51(2):e238366. doi: 10.14503/THIJ-23-8366 (PMC11638472; doi:10.14503/thij-23-8366), 2024-12-12
Supplement: 10.14503_thij-23-8366.s1.pdf [file 10.14503_thij-23-8366.s1.pdf]

## Supplementary Materials

# Nursing Home Admission and Home Care After Acute Aortic Dissection: A Nationwide Registry-Based Cohort Study

Maria Weinkouff Pedersen, MD, PhD<sup>1,2</sup>; Riina Oksjoki, MD, PhD<sup>2,3</sup>; Jacob Eifer Møller MD, PhD<sup>4,5</sup>; Anna Gundlund, MD, PhD<sup>5,6</sup>; Emil Fosbøl, MD, PhD<sup>5</sup>; Dorte Guldbrand Nielsen, MD, PhD<sup>2</sup>; Lars Køber, MD, DMSc<sup>5</sup>; Mikkel Porsborg Andersen, MScPH, PhD<sup>7</sup>; Christian Torp-Pedersen, MD, DMSc<sup>7,8</sup>; Peter Søgaard, MD, DMSc<sup>1</sup>; Niels Holmark Andersen, MD, PhD<sup>1</sup>; Kristian Kragholm, MD, PhD<sup>1,9</sup>

<sup>1</sup>Department of Cardiology, Aalborg University Hospital, Aalborg, Denmark

<sup>2</sup>Department of Cardiology, Aarhus University Hospital, Aarhus N, Denmark

<sup>3</sup>Department of Cardiology, Lillebælt Hospital, Vejle, Denmark

<sup>4</sup>Department of Cardiology, Odense University Hospital, Odense, Denmark

<sup>5</sup>Department of Cardiology, Rigshospitalet, Copenhagen University Hospital, Copenhagen, Denmark

<sup>6</sup>Center for Anaesthesiological Research, Department of Anesthesiology, Zealand University Hospital, Køge, Denmark

<sup>7</sup>Department of Cardiology, Nordsjællands Hospital, Hillerød, Denmark

<sup>8</sup>Department of Public Health, University of Copenhagen, Copenhagen, Denmark

<sup>9</sup>Unit of Clinical Biostatistics and Epidemiology, Aalborg University Hospital, Aalborg, Denmark

**Citation:** *Tex Heart Inst J.* 2024;51(2):e238366. doi: 10.14503/THIJ-23-8366

### Corresponding author:

Maria Weinkouff Pedersen, MD, Department of Cardiology, Aalborg University Hospital, Hobrovej 18-22, 9000 Aalborg, Denmark (mwp@rn.dk)

**Supplemental Table I. ICD-10 codes, ATC codes and operations codes used to define comorbidities and in-hospital complications.**

|                                              |                                                                                                                                                                                                                                                 |
|----------------------------------------------|-------------------------------------------------------------------------------------------------------------------------------------------------------------------------------------------------------------------------------------------------|
| <b>Heart failure</b>                         | <b>ICD-10:</b> I11, I13                                                                                                                                                                                                                         |
| <b>Ischemic heart disease</b>                | <b>ICD-10:</b> I20, I21, I23, I24, I25                                                                                                                                                                                                          |
| <b>Chronic kidney disease</b>                | <b>ICD-10:</b> N02, N03, N04, N05, N06, N07, N08, N11, N12, N14, N18, N19, N26, Q61, I12, I13, N15.8, N15.9, N16.0, N16.2, N16.3, N16.4, N16.8, E10.2, E11.2, E14.2, Z99.2                                                                      |
| <b>Stroke</b>                                | <b>ICD-10:</b> I61, I63, I64, I69.3, I69.4                                                                                                                                                                                                      |
| <b>Aortic dilatation</b>                     | <b>ICD-10:</b> I71.2, I71.4, I71.6, I71.9                                                                                                                                                                                                       |
| <b>Diabetes mellitus</b>                     | <b>ICD-10:</b> E10, E11, E12, E13, E14<br><br><b>ATC*:</b> A10                                                                                                                                                                                  |
| <b>Chronic obstructive pulmonary disease</b> | <b>ICD-10:</b> J42, J43, J44<br><br><b>ATC:</b> R03BB, R03AL                                                                                                                                                                                    |
| <b>Hypertension</b>                          | <b>ICD-10:</b> I10, I11, I12, I13, I15<br><br><b>ATC:</b> C02A, C02B, C02C, C02DA, C02DB, C02DD, C02DG, C02L, C03A, C03B, C03D, C03E, C03X, C07A, C07B, C07C, C07D, C07F, C08, C08G, C09AA, C09BA, C09BB, C09CA, C09DA, C09DB, C09XA02, C09XA52 |
| <b>Acute renal failure</b>                   | <b>ICD-10:</b> N17                                                                                                                                                                                                                              |
| <b>Dialysis</b>                              | <b>Operation:</b> BJFD                                                                                                                                                                                                                          |
| <b>Paraplegia</b>                            | <b>ICD-10:</b> G82                                                                                                                                                                                                                              |

**Supplemental Table II. Characteristics of the patients with acute aortic dissection and their matched controls stratified by sex**

| Variable                        | Female cases<br>(n = 321) | Male cases<br>(n = 772) | Female controls<br>(n = 1,605) | Male controls<br>(n = 3,860) | P-value |
|---------------------------------|---------------------------|-------------------------|--------------------------------|------------------------------|---------|
| Age in years, median [IQR]      | 66 [58, 75]               | 63 [53, 70]             | 66 [58, 75]                    | 63 [53, 70]                  | <0.001  |
| Aortic dissection type A        | 210 (65.4)                | 502 (65.0)              | -                              | -                            |         |
| Conservative treatment          | 28 (13.3) <sup>a</sup>    | 70 (13.9) <sup>a</sup>  | -                              | -                            |         |
| Treated with surgery            | 182 (86.7) <sup>a</sup>   | 432 (86.1) <sup>a</sup> | -                              | -                            |         |
| Aortic dissection type B        | 111 (34.6)                | 270 (35.0)              | -                              | -                            |         |
| Conservative treatment          | 86 (77.5) <sup>b</sup>    | 200 (74.1) <sup>b</sup> | -                              | -                            |         |
| Treated with TEVAR              | 15 (13.5) <sup>b</sup>    | 42 (15.6) <sup>b</sup>  | -                              | -                            |         |
| Treated with surgery            | 10 (9.0) <sup>b</sup>     | 28 (10.3) <sup>b</sup>  | -                              | -                            |         |
| Pre-existing comorbidity: n (%) |                           |                         |                                |                              |         |
| Hypertension                    | 165 (51.4)                | 306 (39.6)              | 529 (33.0)                     | 1,124 (29.1)                 | <0.001  |
| Diabetes                        | 4 (1.2)                   | NA                      | 19 (1.2)                       | 63 (1.6)                     | 0.046   |
| COPD                            | 16 (5.0)                  | 23 (3.0)                | 44 (2.7)                       | 101 (2.6)                    | 0.11    |
| Ischemic heart disease          | 18 (5.6)                  | 24 (3.1)                | 47 (2.9)                       | 139 (3.6)                    | 0.10    |
| Heart failure                   | 4 (1.2)                   | 11 (1.4)                | 13 (0.8)                       | 46 (1.2)                     | 0.53    |
| Stroke                          | 10 (3.1)                  | 12 (1.6)                | 13 (0.8)                       | 55 (1.4)                     | 0.011   |
| Chronic kidney disease          | NA                        | 7 (0.9)                 | 13 (0.8)                       | 23 (0.6)                     | 0.71    |
| Aortic dilatation               | 27 (8.4)                  | 53 (6.9)                | NA                             | 17 (0.4)                     | <0.001  |

P-values are derived using Kruskal-Wallis test for patient age and Pearson's Chi Square for categorical variables. P <0.05 was considered significant.

COPD: Chronic obstructive pulmonary disease, NA: Not available (Number <3), TEVAR: Thoracic endovascular aortic repair

<sup>a</sup> Percentage of patients with aortic dissection type A

<sup>b</sup> Percentage of patients with aortic dissection type B
